# Supplementary material
Source: PubMed Central journal article supplement (PMC5984691)
Supplement: NIHMS950673-supplement-2.pdf [file NIHMS950673-supplement-2.pdf]

**Table 1** Proteins identified in the MDMX complex from human cutaneous melanoma A375 cells

| Total peptides | Reference          | Gene Symbol                | MWT (kDa) | Unique sequence peptides                                                                                                                                                                                                                                                                                                                                                                                                                                       | Coverage |
|----------------|--------------------|----------------------------|-----------|----------------------------------------------------------------------------------------------------------------------------------------------------------------------------------------------------------------------------------------------------------------------------------------------------------------------------------------------------------------------------------------------------------------------------------------------------------------|----------|
| 882            | O15151_MDM4_HUMAN  | MDMX                       | 54.83     |                                                                                                                                                                                                                                                                                                                                                                                                                                                                | 52.65%   |
| 190            | P48729_KC1A_HUMAN  | CSNK1A1<br>(CK1 $\alpha$ ) | 38.89     | 9-16 AEFIVGGK<br>22-46 KIGSGSFGDIYLAINITNGEEVAVK<br>23-46 IGSGSFGDIYLAINITNGEEVAVK<br>54-62 HPQLLYESK<br>66-77 ILQGGVGIPHIR<br>112-123 TVLMLADQMISR<br>124-130 IEYVHTK<br>136-148 DIKPDNFLMGIGR<br>153-162 LFLIDFGLAK<br>171-179 QHIPYREDK<br>187-200 YASINAHLGIEQSR<br>201-216 RDDMESLGYVLMYFNR<br>202-216 DDMESLGYVLMYFNR<br>217-225 TSLPWQGLK<br>265-278 GLRFEEAPDYMYLR<br>268-278 FEEAPDYMYLR<br>287-302 TLNHQYDYTFDWTMLK<br>305-325 AAQQAASSSGGQQQAQTPTGK | 57.86%   |
| 141            | Q8N752_KC1AL_HUMAN | CSNK1A1L<br>(CK1)          | 39.06     | 54-62 HPQLLYESK<br>112-123 TVLMLADQMISR<br>124-130 IEYVHTK<br>153-162 LFLIDFGLAK<br>171-179 QHIPYREDK<br>187-200 YASINAHLGIEQSR<br>201-216 RDDMESLGYVFMFYFNR<br>287-302 TLNHQYDYTFDWTMLK                                                                                                                                                                                                                                                                       | 27.60%   |
| 54             | P04637_P53_HUMAN   | TP53                       | 43.63     | 102-110 TYQGSYGFR<br>111-120 LGFLHSGTAK<br>197-209 VEGNLRVEYLDDR<br>203-209 VEYLDDR<br>203-213 VEYLDDRNTFR<br>249-267 RPILTITLEDSSGNLLGR<br>307-319 ALPNNTSSSPQPK<br>320-333 KKPLDGEYFTLQIR<br>321-333 KPLDGEYFTLQIR<br>338-342 FEMFR<br>343-351 ELNEALELK                                                                                                                                                                                                     | 24.43%   |
| 51             | P31946_1433B_HUMAN | YWHAB<br>(14-3-3)          | 28.06     | 21-29 YDDMAAMK<br>30-43 AVTEQGHLSNEER<br>44-51 NLLSVAYK<br>63-70 VISSIEQK<br>106-117 YLIPNATQPESK<br>130-140 YLSEVASGDNK<br>141-159 QTTVSNSQQAYQEAFEISK<br>196-214 TAFDEAIAELDTLNEESYK<br>196-224<br>TAFDEAIAELDTLNEESYKDSTLIMQLLR<br>215-224 DSTLIMQLLR                                                                                                                                                                                                       | 44.72%   |

|    |                    |                   |       |                                                                                                                                                                                                                                                                                                                                                                          |        |
|----|--------------------|-------------------|-------|--------------------------------------------------------------------------------------------------------------------------------------------------------------------------------------------------------------------------------------------------------------------------------------------------------------------------------------------------------------------------|--------|
| 25 | P62258_1433E_HUMAN | YWHAE<br>(14-3-3) | 29.16 | 13-29 LAEQAERYDEMVESMK<br>13-28 LAEQAERYDEMVESMK<br>30-42 VAGMDVELTVEER<br>43-50 NLLSVAYK<br>107-118 HLIPAANTGESK<br>131-141 YLAEFATGNDR<br>143-153 EAAENSLVAYK<br>154-170 AASDIAMTELPPTHPIR<br>197-215 AAFDDAIAELDTLSEESYK<br>197-225<br>AAFDDAIAELDTLSEESYKDSTLIMQLLR<br>216-225 DSTLIMQLLR<br>226-244 DNLTWTSMDMQGDGEEQNK<br>226-255<br>DNLTWTSMDMQGDGEEQNKALQDVEDENQ | 58.04% |
| 20 | Q00987_MDM2_HUMAN  | MDM2              | 55.2  | 46-64 DTYTMKEVLFYLGQYIMTK<br>52-64 EVLFYLGQYIMTK<br>98-105 KIYTMiYR<br>99-105 IYTMiYR<br>106-126 NLVVVNQEQSSDGTSSVSENK<br>137-161 DLVQELQEEKPSSSHLVSRPSTSSR<br>163-179 RAISETEENSDELSEGER<br>164-179 AISETEENSDELSEGER                                                                                                                                                   | 18.33% |
| 16 | P27348_1433T_HUMAN | YWHAQ<br>(14-3-3) | 27.75 | 28-41 AVTEQGAELSNEER<br>42-49 NLLSVAYK<br>61-68 VISSIEQK<br>104-115 YLIANATNPESK<br>139-158 KQTIDNSQGAYQEAFDISKK<br>140-158 QTIDNSQGAYQEAFDISKK<br>140-157 QTIDNSQGAYQEAFDISK<br>194-212 TAFDEAIAELDTLNEDSYK<br>194-222<br>TAFDEAIAELDTLNEDSYKDSTLIMQLLR<br>213-222 DSTLIMQLLR                                                                                           | 37.14% |
| 15 | O15350_P73_HUMAN   | TP73              | 69.58 | 139-149 SATWTYSPLLK<br>165-176 VSTPPPPGTAIR<br>202-216 DFNEGQSAPASHLIR<br>217-233 VEGNNLSQYVDDPVTGR<br>332-345 QSPPAVPALGAGVK<br>349-360 HGDEDTYYLQVR<br>361-370 GRENFELMK<br>371-390 LKESLELMELVPQPLVDSYR<br>373-390 ESLELMELVPQPLVDSYR<br>391-416<br>QQQQLLQRPSHLQPPSYGPVLSPMKNK<br>563-579 SSNAATISIGGSGELQR<br>592-599 HTITIPNR<br>623-636 KQPIKEEFTEAEIH            | 27.67% |
| 12 | P61981_1433G_HUMAN | YWHAG<br>(14-3-3) | 28.28 | 20-28 YDDMAAAMK<br>29-42 NVTELNEPLSNEER<br>43-50 NLLSVAYK<br>62-69 VISSIEQK<br>133-142 YLAEVATGEK<br>144-152 ATVVESSEK<br>199-217 TAFDDAIAELDTLNEDSYK<br>199-227<br>TAFDDAIAELDTLNEDSYKDSTLIMQLLR<br>218-227 DSTLIMQLLR<br>228-247 DNLTWTSMDQDDGGEGNN                                                                                                                    | 43.32% |

|   |                    |                   |       |                                                                                                                                                                                                      |        |
|---|--------------------|-------------------|-------|------------------------------------------------------------------------------------------------------------------------------------------------------------------------------------------------------|--------|
| 7 | Q96FA3_PELI1_HUMAN | PELI1             | 46.26 | 73-83 DQHSISYTLR<br>105-136 STESPIDFVVTDTVPGSQSNSTQSVQSTISR<br>153-162 IYAAGFDSSK<br>411-418 LIFQGPLD                                                                                                | 14.59% |
| 6 | Q04917_1433F_HUMAN | YWHAH<br>(14-3-3) | 28.2  | 29-42 AVTELNEPLSNEDR<br>43-50 NLLSVAYK<br>62-69 VISSIEQK<br>133-142 YLAEVASGEK<br>144-155 NSVVEASEAAYK<br>199-217 QAFDDAIAELDTLNEDSYK<br>199-227 QAFDDAIAELDTLNEDSYKDSTLIMQLLR<br>218-227 DSTLIMQLLR | 32.93% |

**Table 2** Demographic and clinical characteristics in the patients with cutaneous melanoma

|                         | PELI1 low<br>Total n (%) | PELI1 high<br>Total n (%) | p value |
|-------------------------|--------------------------|---------------------------|---------|
| Number of Samples       | 116                      | 117                       |         |
| <b>Gender</b>           |                          |                           |         |
| Male                    | 71 (61%)                 | 70 (60%)                  | p=0.830 |
| Female                  | 45 (39%)                 | 47 (40%)                  |         |
| <b>Age of diagnosis</b> |                          |                           |         |
| ≤ 60                    | 66 (57%)                 | 67 (57%)                  | p=0.995 |
| >60                     | 50 (43%)                 | 50 (43%)                  |         |
| <b>TNM stage*</b>       |                          |                           |         |
| I-II                    | 62 (57%)                 | 50 (49%)                  | p=0.223 |
| III-IV                  | 46 (43%)                 | 52 (51%)                  |         |
| <b>p53 status#</b>      |                          |                           |         |
| Wild-type               | 62 (91%)                 | 60 (79%)                  | p=0.042 |
| Mutant                  | 6 (9%)                   | 16 (21%)                  |         |

Complete data from 233 patients was analyzed for gender and age of diagnosis. \* Data for TNM stage was analyzed from 210 patients. #Data for p53 status was analyzed from 154 patients. p value is from chi-square test.
